# Supplementary material
Source: Royal Society of Chemistry journal article supplement (doi:10.1039/d6ay00082g)
Supplement: d6ay00082g1.pdf [file d6ay00082g1.pdf]

1  
2  
3  
4  
5  
6  
7  
8  
9  
10  
11  
12  
13  
14  
15  
16

## Support Information

**Hydrogen-bond enhanced Tb/Eu-MOF visual detection for multiple trace  
fluoroquinolones in seawater and a portable 3D-printed sensor**

**Zheng Chen<sup>1</sup>, Shuaibo Song<sup>1</sup>, Jiahao Lu<sup>1</sup>, Simin Wang<sup>1</sup>, Shuo Chen<sup>1</sup>, Zhong  
Han<sup>1</sup>, Fang Yuan \*<sup>12</sup>**

**1: College of Urban Construction, Nanjing Tech University, Puzhu Road 30,  
Nanjing 211816, P. R.China**

**2: NJTECH University Suzhou Future Membrane Technology Innovation Center,  
Zhangji Road 135, Suzhou 215333, P. R.China**

**\*Corresponding author: Fang Yuan**

**\*e-mail: [yuanf@njtech.edu.cn](mailto:yuanf@njtech.edu.cn)**

### 17 **Text S1. Synthesis of (Tb)<sub>x</sub>(Eu)<sub>y</sub>-MOF@BTEC**

18 The Eu<sup>3+</sup> doping ratio in the material was optimized. Prepared (Tb)<sub>x</sub>(Eu)<sub>y</sub>-  
19 MOF@BTEC via a one-pot method. (Tb)<sub>x</sub>+(Eu)<sub>y</sub>=0.4mmol, with (Tb)<sub>x</sub>: (Eu)<sub>y</sub> ratios  
20 of 1:0, 72:1, 36:1, and 18:1 for low Eu doping. Take (0.40, 0.3945, 0.3892, or 0.3790  
21 mmol) Tb(NO<sub>3</sub>)<sub>3</sub>·6H<sub>2</sub>O, (0, 0.0055, 0.0108, or 0.0210 mmol) Eu(NO<sub>3</sub>)<sub>3</sub>·6H<sub>2</sub>O, 0.3  
22 mmol trimesic acid (H<sub>3</sub>BTC), and 0.1 mmol 1,2,4,5-benzenetetracarboxylic acid  
23 (H<sub>4</sub>BTEC) were ultrasonically dissolved in 5.7 mL DMF. Then, 34.3 mL ultrapure  
24 water was added and mixed. The final mixture was transferred to a reaction vessel,  
25 heated to 105°C, and maintained for 24 hours. Unreacted ligands and metal ions were  
26 sequentially removed by vacuum filtration using ethanol, water, and ethanol. After  
27 drying at 60°C for 5 hours, four Tb/Eu-BTC@BTEC composites with different Eu  
28 doping ratios were obtained.

### 29 **Text S2. Synthesis of Ln - (H<sub>3</sub>BTC)<sub>x</sub> (H<sub>4</sub>BTEC)<sub>y</sub>**

30 The H<sub>4</sub>BTEC doping ratio in the material was optimized. Prepare Ln - (H<sub>3</sub>BTC)<sub>x</sub>  
31 (H<sub>4</sub>BTEC)<sub>y</sub> via a one-pot method. (H<sub>3</sub>BTC)<sub>x</sub>+ (H<sub>4</sub>BTEC)<sub>y</sub> =0.4mmol, (H<sub>3</sub>BTC)<sub>x</sub>:  
32 (H<sub>4</sub>BTEC)<sub>y</sub> = 1:0, 18:1, 9:1, and 3:1, with minor H<sub>4</sub>BTEC doping. Take 0.3892 mmol  
33 Tb(NO<sub>3</sub>)<sub>3</sub>·6H<sub>2</sub>O, 0.0108 mmol Eu(NO<sub>3</sub>)<sub>3</sub>·6H<sub>2</sub>O, (0.40, 0.3790, 0.36, or 0.3 mmol)  
34 trimesic acid (H<sub>3</sub>BTC), and (0, 0.0210, 0.04, or 0.1 mmol) 1,2,4,5-  
35 Benzenetetracarboxylic acid (H<sub>4</sub>BTEC) was ultrasonically dissolved in 5.7 mL DMF,  
36 followed by addition of 34.3 mL ultrapure water for mixing. The final mixture was  
37 transferred to a reactor, heated to 105° C, and maintained for 24 h. Unreacted ligands  
38 and metal ions were sequentially removed by vacuum filtration using ethanol, water,  
39 and ethanol. After drying at 60° C for 5 hours, four H<sub>4</sub>BTEC composites with different  
40 Ln - (H<sub>3</sub>BTC)<sub>x</sub> (H<sub>4</sub>BTEC)<sub>y</sub> ratios were obtained.

41

### 42 **Text S3 Calculation of values for HOMO/LUMO**

43 HOMO and LUMO energy levels were calculated using Gaussian 16W and  
44 GaussView 6.0 software. GaussView 6.0 was employed for molecular model  
45 construction, while Gaussian 16W was used for energy level calculations. Following  
46 model construction, structural optimization was performed to ensure full relaxation of

47 all atomic positions until energy and force tolerances reached  $1 \times 10^{-5}$  eV and  $0.03$  eV/Å,  
48 respectively. Under these ground-state conditions, DFT calculations were performed  
49 on the molecular model, accounting for the influence of the dispersed system (seawater)  
50 on the HOMO and LUMO energy levels of the doped ligands (H<sub>3</sub>BTC, H<sub>4</sub>BTEC) and  
51 target antibiotics (FLE, NOR, ENR) within the material.

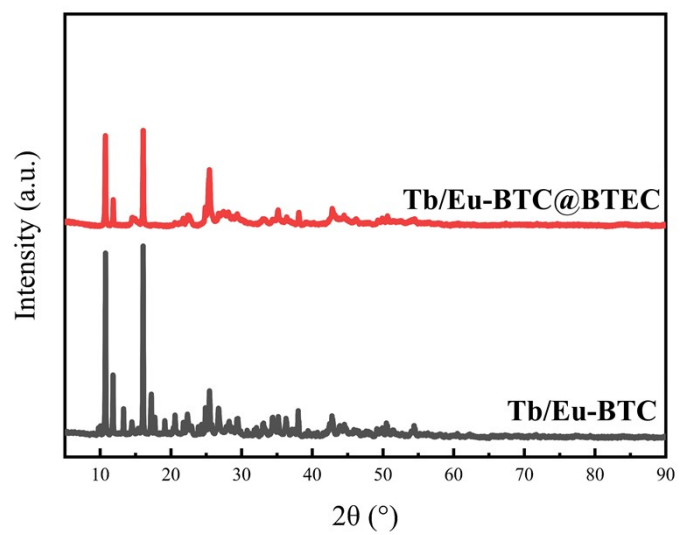

52

53 Fig. S1 XRD patterns of MOF material before and after  $H_4BTEC$  modification

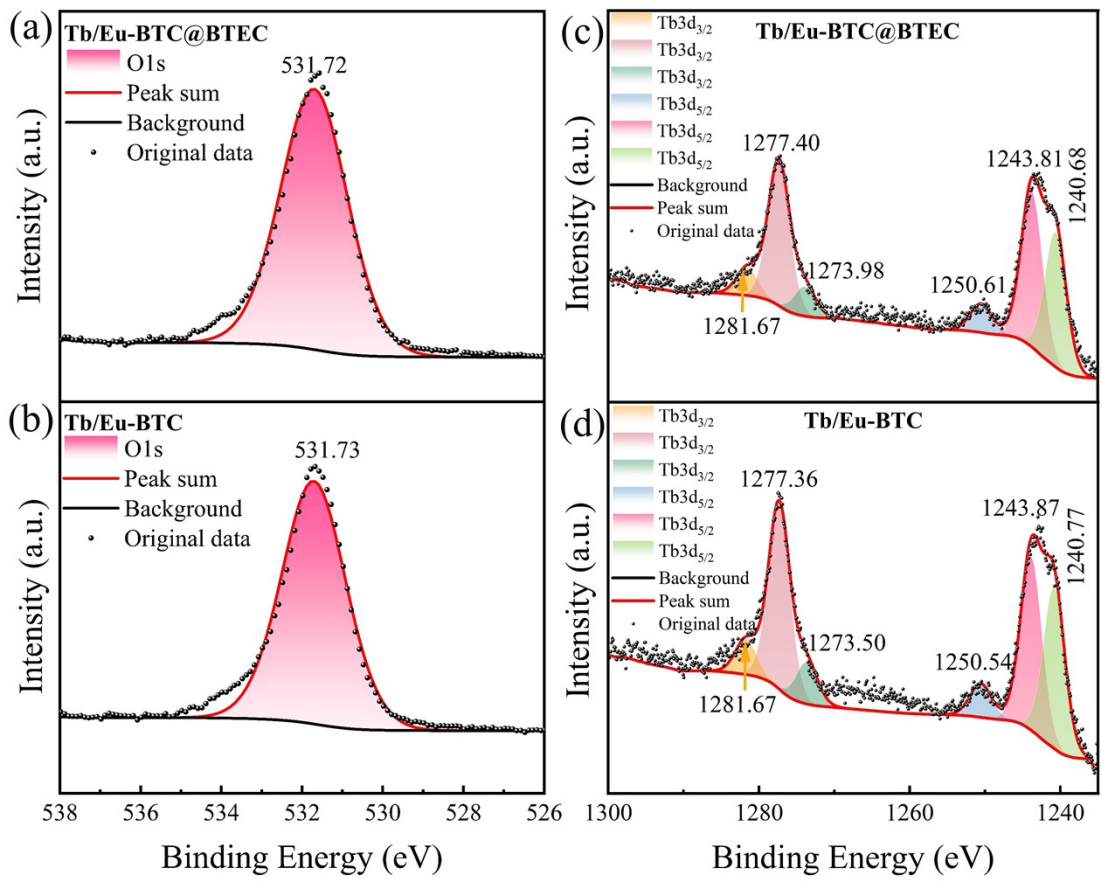

54

55 Fig. S2 (a) O1s spectra of Tb/Eu-BTC@BTEC and (b) Tb/Eu-BTC; (c) Tb3d spectra of Tb/Eu-  
 56 BTC@BTEC and (d) Tb/Eu-BTC

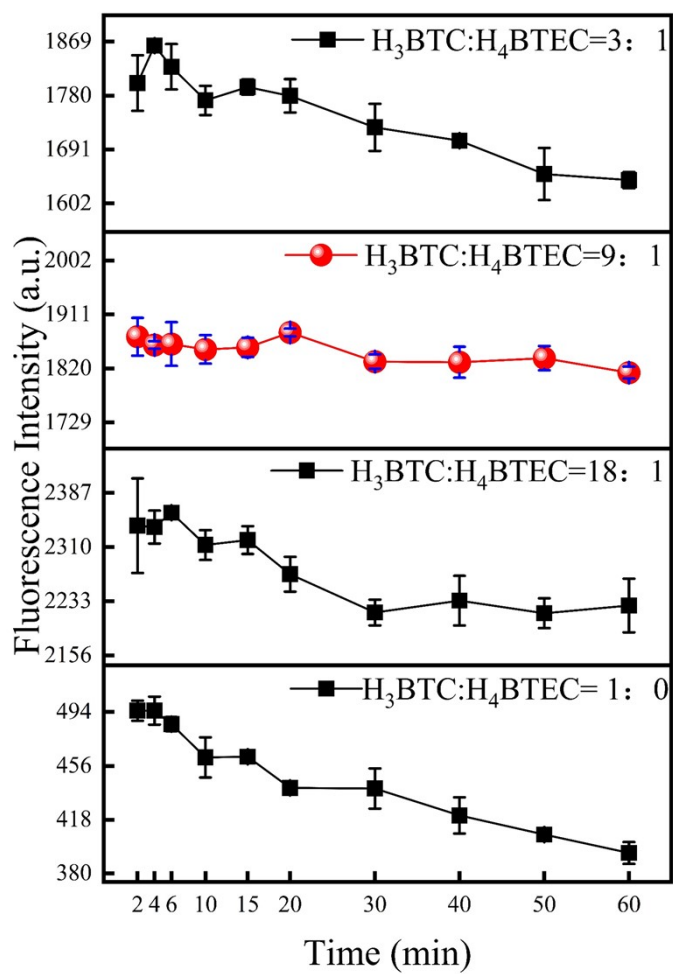

58

59 Fig. S3 Fluorescence stability of the material in simulated seawater over 60 minutes under  
 60 varying H<sub>3</sub>BTC:H<sub>4</sub>BTEC ratios

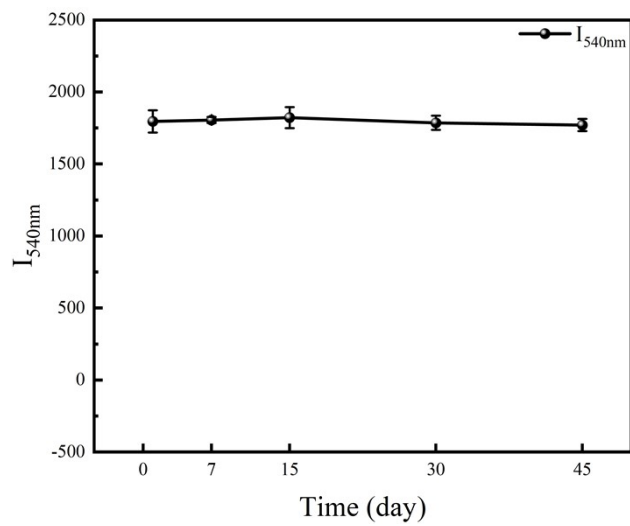

62

63 Fig. S4 45-day storage stability of Tb/Eu-BTC@BTEC

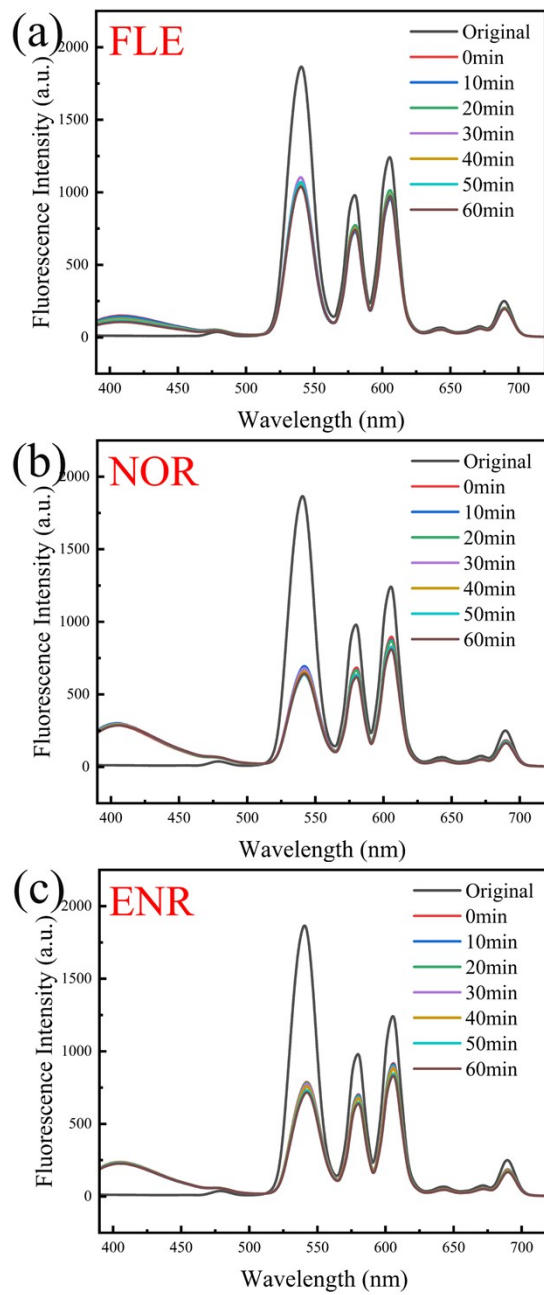

64

65 Fig. S5 Fluorescence change spectrum within 60 minutes after adding (a) FLE, (b) NOR, and (c)  
66 ENR to the dispersed system

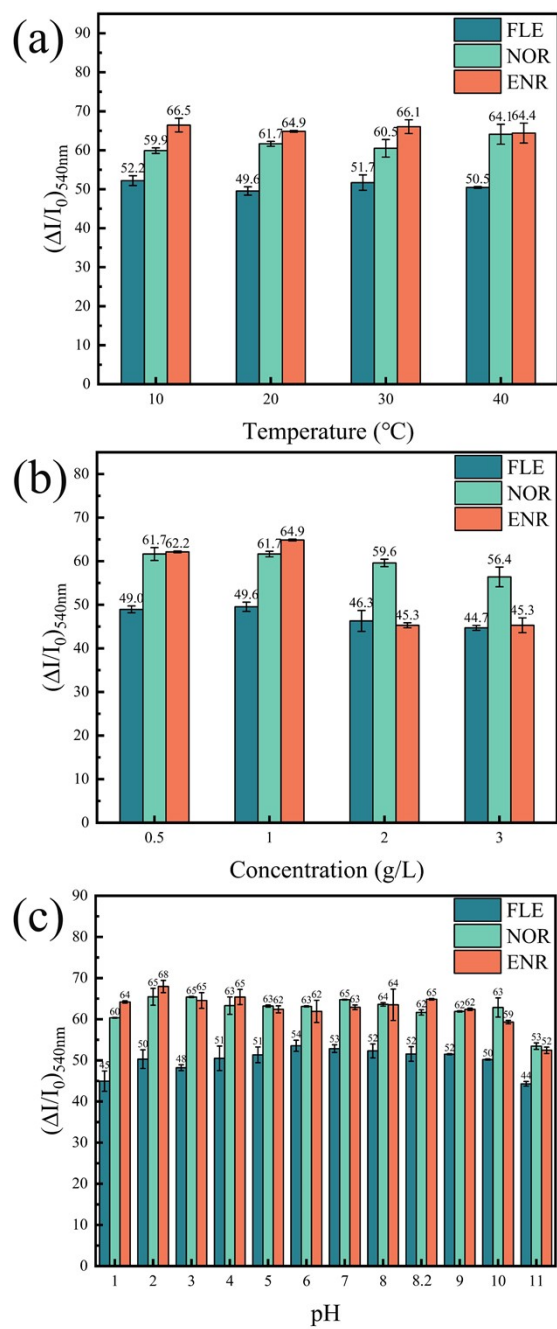

67

68 Fig. S6 Extinction rates of materials for FLE, NOR, and ENR at 540 nm under (a) different  
 69 temperatures, (b) different dispersion concentrations, and (c) different pH conditions.

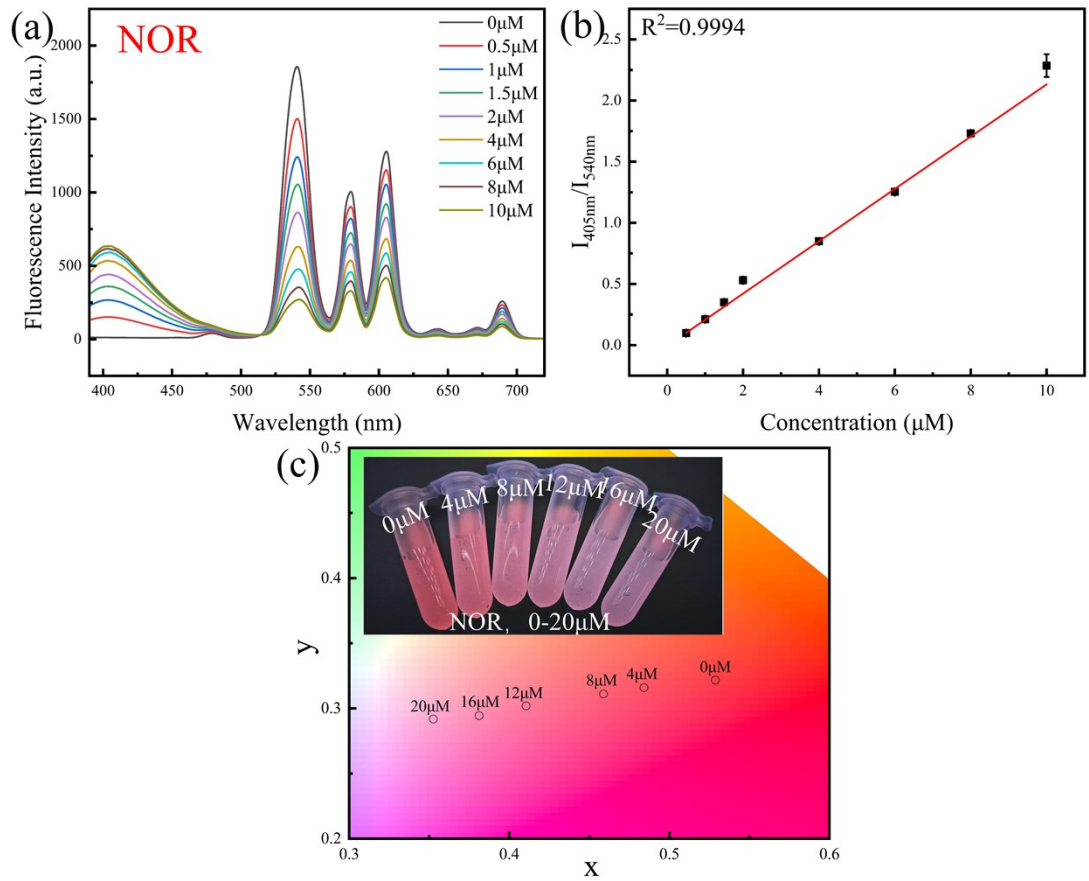

70

71 Fig. S7 Detection of NOR by Tb/Eu-BTC@BTEC in simulated seawater dispersion system ; (b)

72 Linear relationship between  $I_{405nm}/I_{540nm}$  and NOR concentration; (c) Photograph and CIE diagram

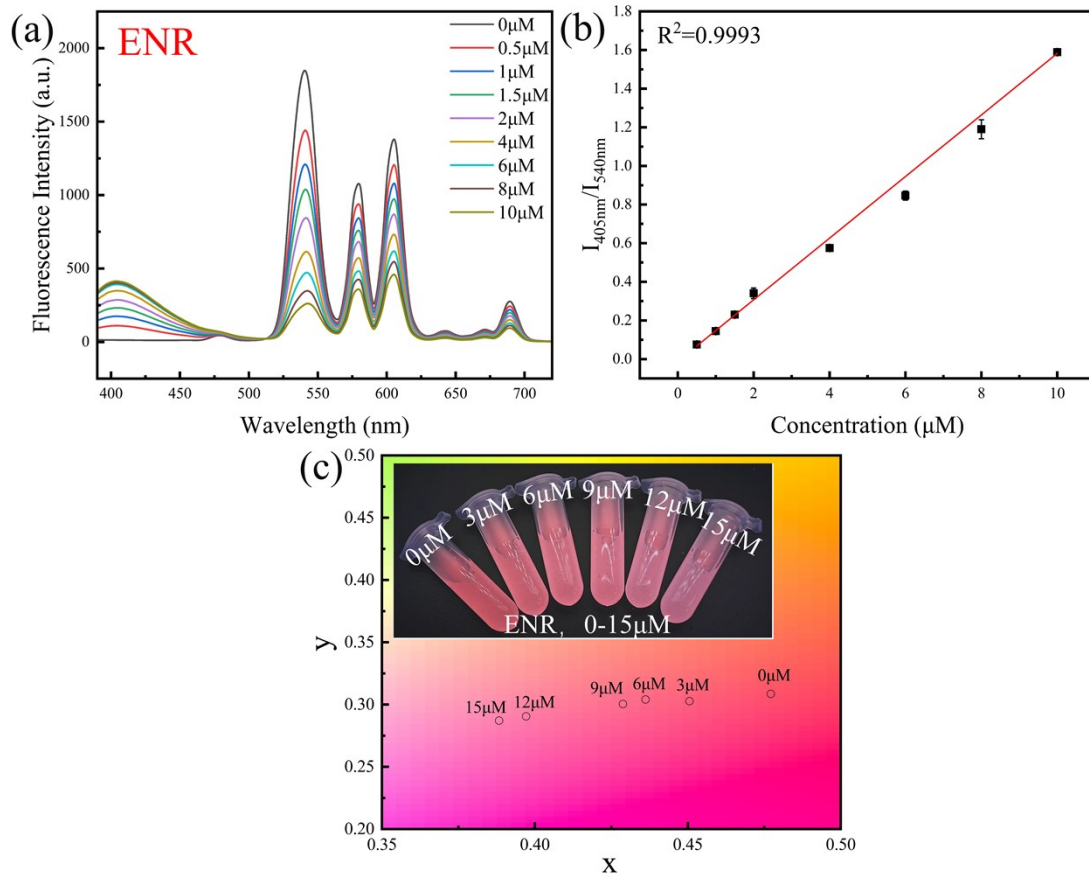

73

74 Fig. S8 Detection of ENR by Tb/Eu-BTC@BTEC in simulated seawater dispersion system ; (b)

75 Linear relationship between  $I_{405\text{nm}}/I_{540\text{nm}}$  and ENR concentration; (c) Photograph and CIE diagram

76 diagram

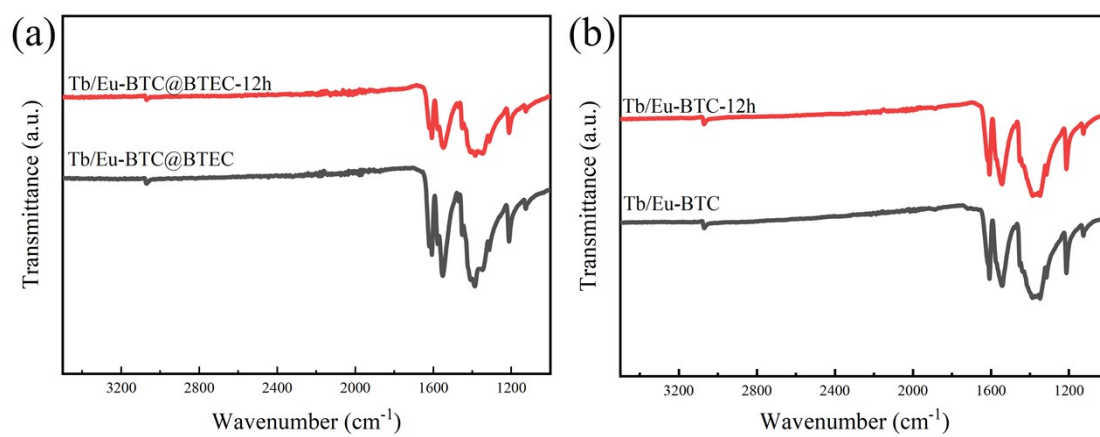

77

78 Fig. S9 FTIR spectra of (a) Tb/Eu-BTC@BTEC and (b) Tb/Eu-BTC before and after 12-hour  
79 seawater immersion treatment

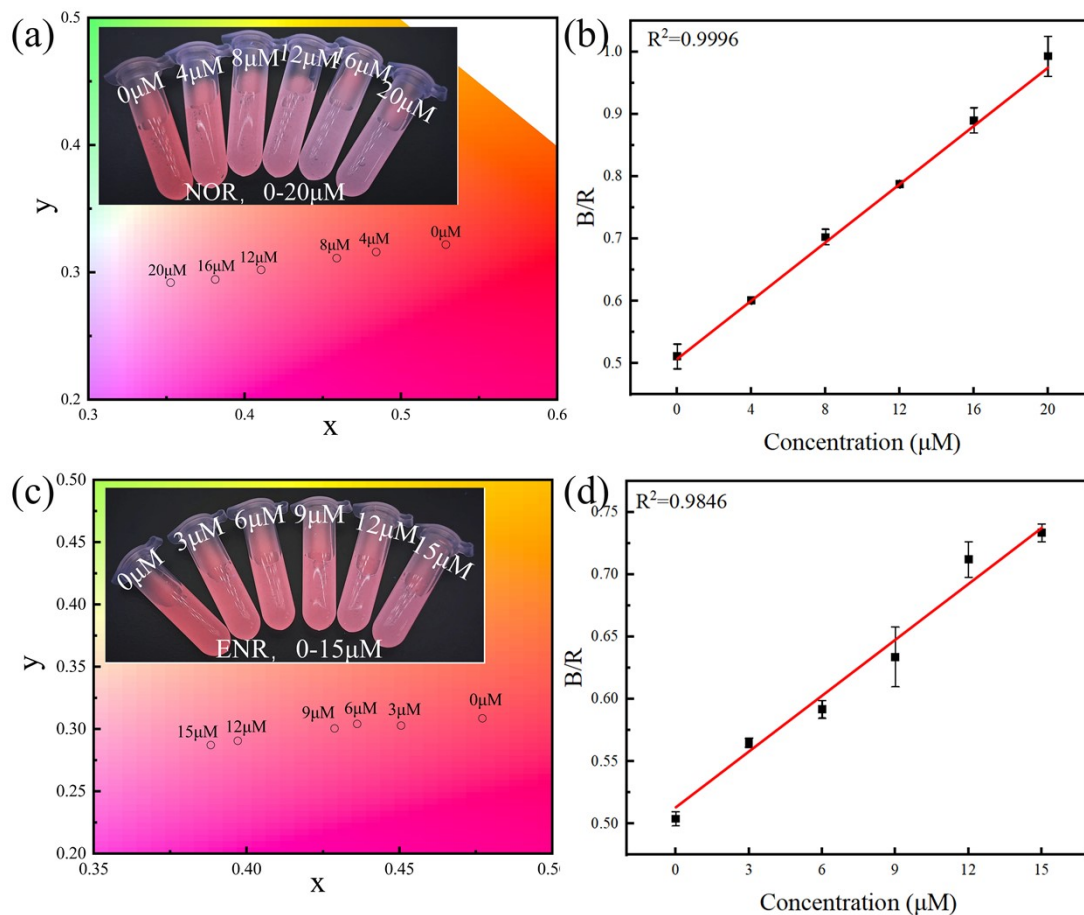

80

81 Fig. S10 (a) CIE diagram of 0–20 μM NOR detection in seawater samples, (b) Linear relationship  
 82 between signal and NOR concentration; (c) CIE diagram of 0–20 μM ENR detection in seawater  
 83 samples, (d) Linear relationship between signal and ENR concentration

Table S1 Simulating the chemical composition of seawater

| Compound                                             | Concentration (g/L) |
|------------------------------------------------------|---------------------|
| NaCl                                                 | 24.53g/L            |
| Na <sub>2</sub> SO <sub>4</sub>                      | 4.094g/L            |
| MgCl <sub>2</sub> ·6H <sub>2</sub> O                 | 11.112g/L           |
| CaCl <sub>2</sub>                                    | 1.158g/L            |
| SrCl <sub>2</sub> ·6H <sub>2</sub> O                 | 0.042g/L            |
| KCl                                                  | 0.695g/L            |
| NaHCO <sub>3</sub>                                   | 0.201g/L            |
| KBr                                                  | 0.100g/L            |
| H <sub>3</sub> BO <sub>3</sub>                       | 0.027g/L            |
| NaF                                                  | 0.003g/L            |
| BaCl <sub>2</sub>                                    | 5.2mg/L             |
| Mn(NO <sub>3</sub> ) <sub>2</sub> ·6H <sub>2</sub> O | 5.4 mg/L            |
| Cu(NO <sub>3</sub> ) <sub>2</sub> ·3H <sub>2</sub> O | 3.9 mg/L            |
| Zn(NO <sub>3</sub> ) <sub>2</sub> ·6H <sub>2</sub> O | 1.51 mg/L           |
| Pb(NO <sub>3</sub> ) <sub>2</sub>                    | 0.56 mg/L           |
| AgNO <sub>3</sub>                                    | 0.04 mg/L           |

Table S2 Initial parameters of two seawater samples

| Sample name                                 | Initial FLE concentration ( $\mu\text{M}$ ) | Initial NOR concentration ( $\mu\text{M}$ ) | Initial ENR concentration ( $\mu\text{M}$ ) | pH   |
|---------------------------------------------|---------------------------------------------|---------------------------------------------|---------------------------------------------|------|
| Seawater along the coast of Dalian, China   | 0                                           | 0                                           | 0                                           | 7.80 |
| Seawater in a farming area in Dalian, China | 0                                           | 0                                           | 0                                           | 7.69 |

Table S3 XPS survey data for the C1s energy level (atomic percentage)

| Samples                     | Assignment      | Peak BE | FWHM eV | Atomic(%) |
|-----------------------------|-----------------|---------|---------|-----------|
| Tb/Eu-<br>BTC@BTEC<br>(C1s) | $\pi$ - $\pi^*$ | 290.99  | 3.12    | 6.82      |
|                             | O=C-O           | 288.64  | 1.58    | 24.52     |
|                             | C-C             | 286.75  | 1.19    | 4.41      |
|                             | C=C             | 284.80  | 1.75    | 64.25     |
|                             | $\pi$ - $\pi^*$ | 289.77  | 3.37    | 10.14     |
| Tb/Eu-BTC(C1s)              | O=C-O           | 288.61  | 1.29    | 18.40     |
|                             | C-C             | 286.72  | 3.37    | 31.03     |
|                             | C=C             | 284.80  | 1.26    | 40.43     |

90 Table S4 Field-based ENR measurements of FLE and NOR using a portable device in the coastal  
 91 waters of Dalian, China

| Sample                                    | Antibiotics | Concentration (μM) | Found (μM) | Recovery (%) | RSD (%; n = 3) |
|-------------------------------------------|-------------|--------------------|------------|--------------|----------------|
| Seawater along the coast of Dalian, China | FLE         | 2                  | 2.09       | 104.00       | 2.36           |
|                                           |             | 6                  | 5.61       | 93.16        | 3.51           |
|                                           |             | 10                 | 10.02      | 100.20       | 5.21           |
|                                           |             | 12                 | 12.64      | 105.33       | 5.94           |
|                                           | NOR         | 2                  | 2.06       | 103.00       | 5.59           |
|                                           |             | 6                  | 6.51       | 108.50       | 2.50           |
|                                           |             | 10                 | 9.31       | 93.10        | 5.59           |
|                                           |             | 12                 | 13.21      | 110.00       | 2.49           |
|                                           | ENR         | 2                  | 1.89       | 94.50        | 4.88           |
|                                           |             | 6                  | 6.22       | 103.67       | 0.55           |
|                                           |             | 10                 | 10.59      | 105.90       | 1.19           |
|                                           |             | 12                 | 11.57      | 96.41        | 2.94           |

92

93 Table S5 Field-based ENR measurements of FLE and NOR in seawater dispersion systems at a  
 94 Dalian aquaculture zone, China using a portable device

| Sample                                                     | Antibiotics | Concentration (μM) | Found (μM) | Recovery (%) | RSD (%; n = 3) |
|------------------------------------------------------------|-------------|--------------------|------------|--------------|----------------|
| Seawater<br>in a<br>farming<br>area in<br>Dalian,<br>China | FLE         | 2                  | 1.94       | 97.00        | 2.56           |
|                                                            |             | 6                  | 6.75       | 112.50       | 4.96           |
|                                                            |             | 10                 | 10.40      | 104.00       | 0.92           |
|                                                            | NOR         | 12                 | 11.41      | 95.08        | 2.88           |
|                                                            |             | 2                  | 2.07       | 100.35       | 2.22           |
|                                                            |             | 6                  | 5.92       | 98.66        | 3.20           |
|                                                            |             | 10                 | 9.89       | 98.90        | 1.43           |
|                                                            |             | 12                 | 11.21      | 93.41        | 5.66           |
|                                                            |             | 2                  | 1.97       | 98.50        | 4.21           |
|                                                            | ENR         | 6                  | 6.20       | 103.33       | 4.89           |
|                                                            |             | 10                 | 11.64      | 116.40       | 3.74           |
|                                                            |             | 12                 | 12.16      | 101.33       | 2.50           |

95
